# Supplementary material for: Highly efficient generation of isogenic pluripotent stem cell models using prime editing
Source: eLife journal article supplement (doi:10.7554/elife.79208), 2022-09-07
Supplement: supp [file elife-79208-supp-v1.zip]

Figure 2 —figure supplement 2 source data

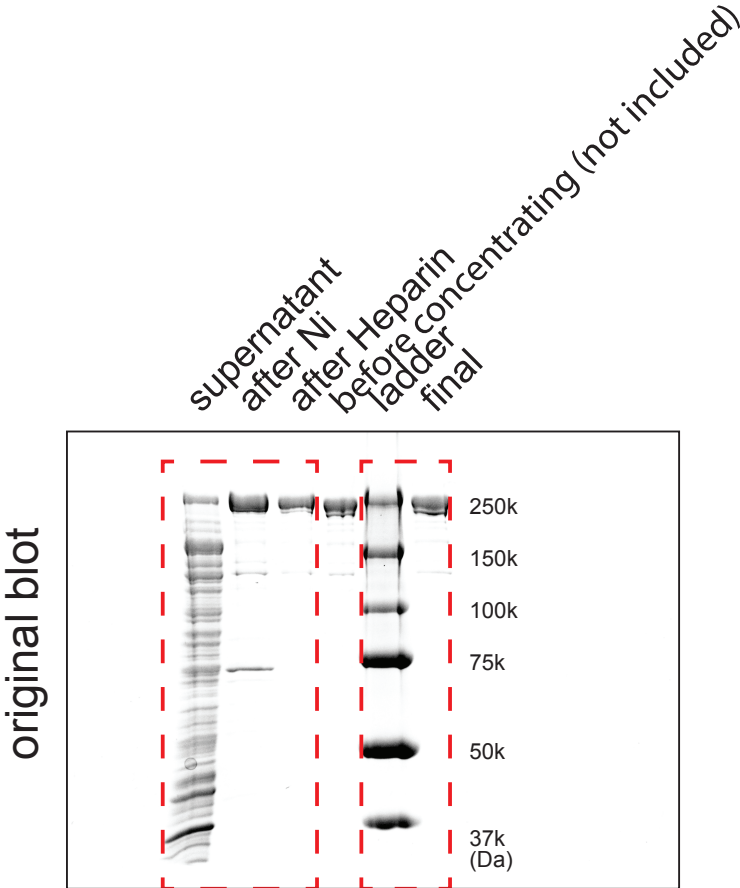

Figure 2 —figure supplement 2  
left panel  
Figure 2 —figure supplement 2  
right panel horizontally flipped
